# Supplementary material
Source: PubMed Central journal article supplement (PMC9327731)
Supplement: bcd-21-0039_supplementary_table_1_suppt1.pdf [file bcd-21-0039_supplementary_table_1_suppt1.pdf]

| Name             | Orientation          | Sequence (5' -> 3')                                                                          |
|------------------|----------------------|----------------------------------------------------------------------------------------------|
| shRNA-MmCar1-1_F | F                    | GTTCTGTATGAGACCACAGGGGT <u>CCCCAGAACAGTCAGAGCCTCATTCTCGAGAAATG</u><br>AGGCTCTGACIGTTCTTTTT   |
|                  | Tm (°C) <sup>‡</sup> | 79.5                                                                                         |
| shRNA-MmCar1-1_R | R                    | GACCCACCTCCAACCCCGAG <u>AAAAAGAACAGTCAGAGCCTCATTCTCGAGAAATGAG</u><br>GCTCTGACTGTCTCGGGG      |
|                  | Tm (°C) <sup>‡</sup> | 79.5                                                                                         |
| shRNA-MmCar1-2_F | F                    | GTTCTGTATGAGACCACAGGGGT <u>CCCCGCTTCCTTCATCTCTGGATTACTCGAGTAATCC</u><br>AGAGATGAAGGAAGCTTTTT |
|                  | Tm (°C) <sup>‡</sup> | 79.0                                                                                         |
| shRNA-MmCar1-2_R | R                    | GACCCACCTCCAACCCCGAG <u>AAAAAGCTTCCTTCATCTCTGGATTACTCGAGTAATCCAG</u><br>AGATGAAGGAAGCGGGG    |
|                  | Tm (°C) <sup>‡</sup> | 79.0                                                                                         |
| shRNA-MmCar1-3_F | F                    | GTTCTGTATGAGACCACAGGGGT <u>CCCCCGTGGATGGAAGTAGATATTCTCGAGAATAT</u><br>CTAGTCCATCCACGGTTTTT   |
|                  | Tm (°C) <sup>‡</sup> | 78.8                                                                                         |
| shRNA-MmCar1-3_R | F                    | GACCCACCTCCAACCCCGAG <u>AAAAACCGTGGATGGAAGTAGATATTCTCGAGAATATCT</u><br>AGTCCATCCACGGGGGG     |
|                  | Tm (°C) <sup>‡</sup> | 78.8                                                                                         |

### Supplementary Table 1: Oligonucleotides used

*Oligonucleotides used are indicated above. The annealing sequence is underlined. ‡: Tm was calculated using the Life Technologies Tm Calculator tool on the web.*
